# Supplementary material for: Identification of Potential Immune Checkpoint Inhibitor Targets in Gliomas via Bioinformatic Analyses
Source: PubMed Central journal article supplement (PMC8860561; doi:10.1155/2022/1734847), 2022-02-14

Supplementary File

Figure S1. The expression of immune checkpoint genes correlate with age and gender: (A) CD274, (B) CTLA4, (C) HAVCR2, (D) LAG3, (E) TIGIT, (F) PDCD1, (G) PDCD1LG2, and (H) SIGLEC15.

Figure 1 A

CD274

A

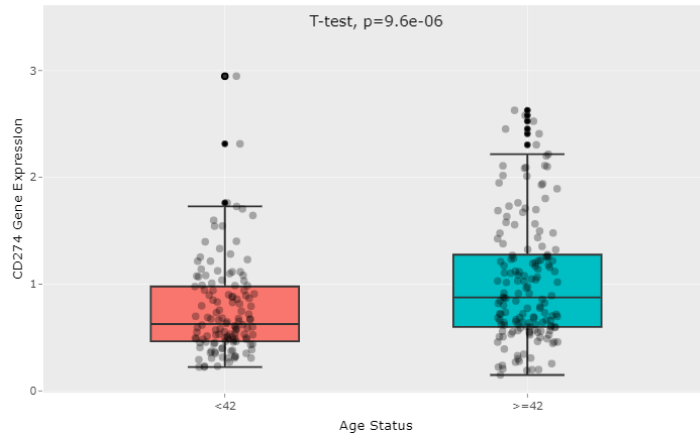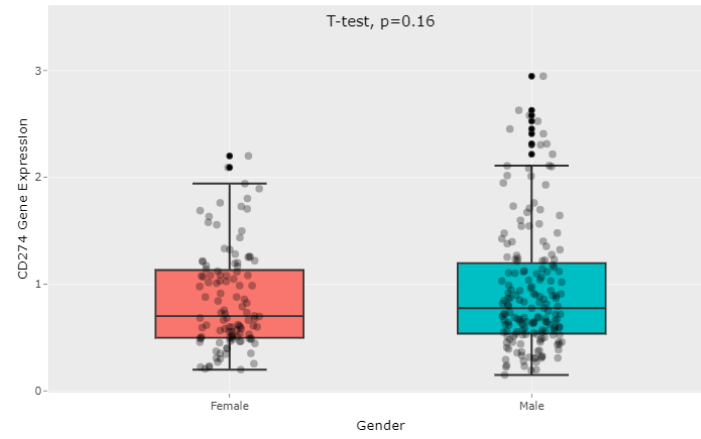

CTLA4

B

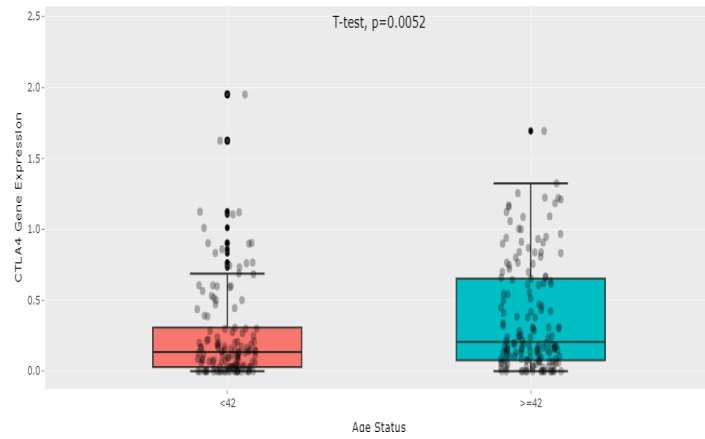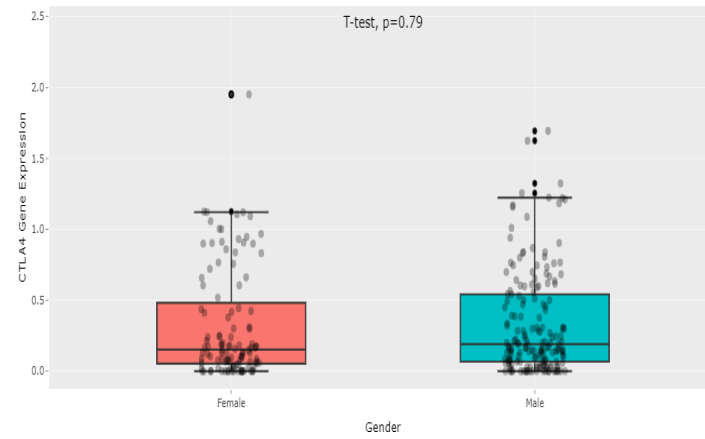

Figure1 B

### HAVCR2

C

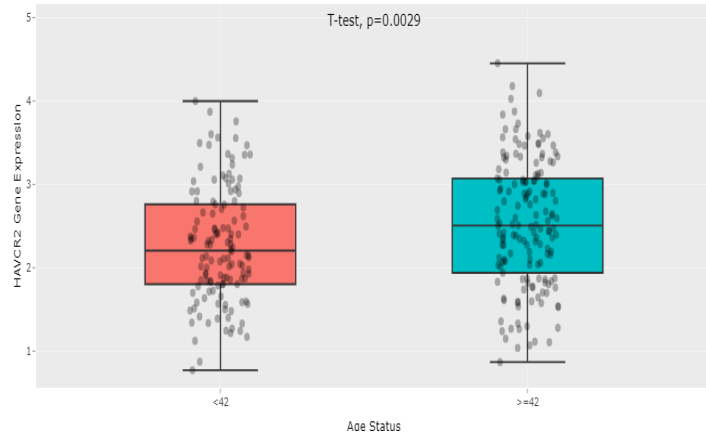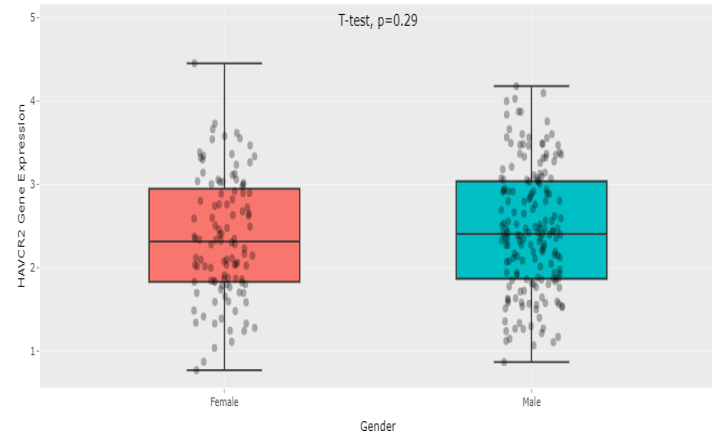

### LAG3

D

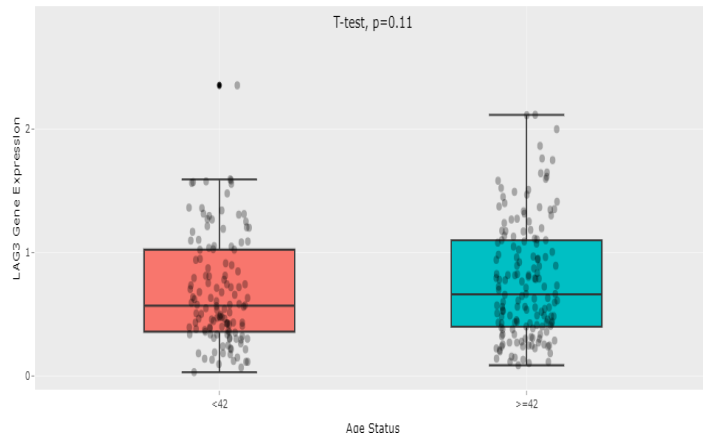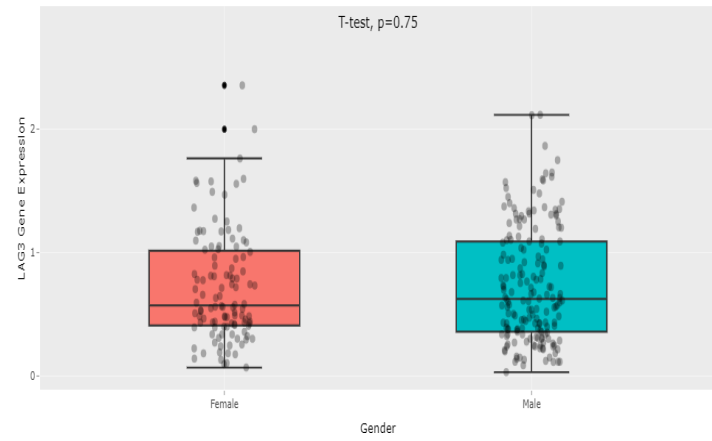

Figure 1 C

E

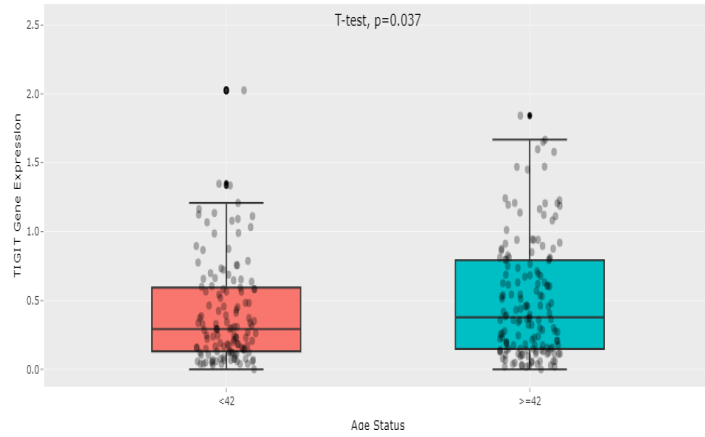

TIGIT

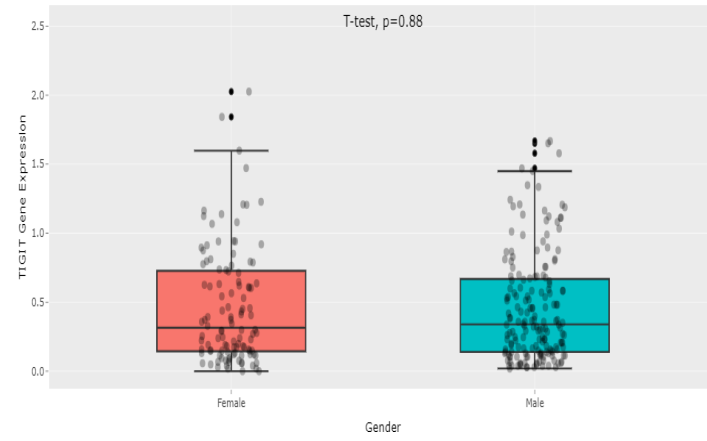

PDCD1

F

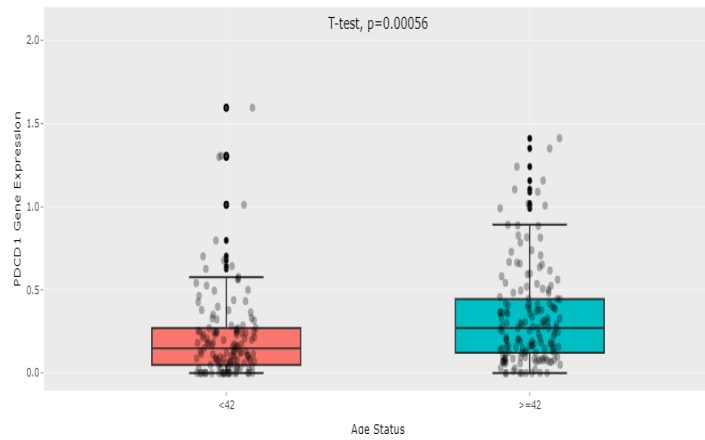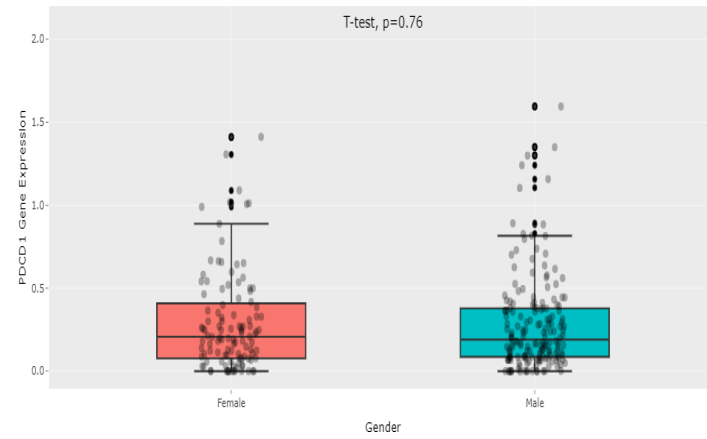

Figure 1 D

### PDCD1LG2

G

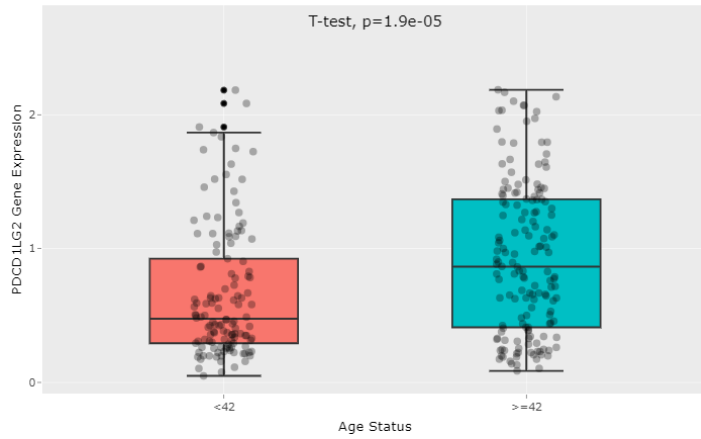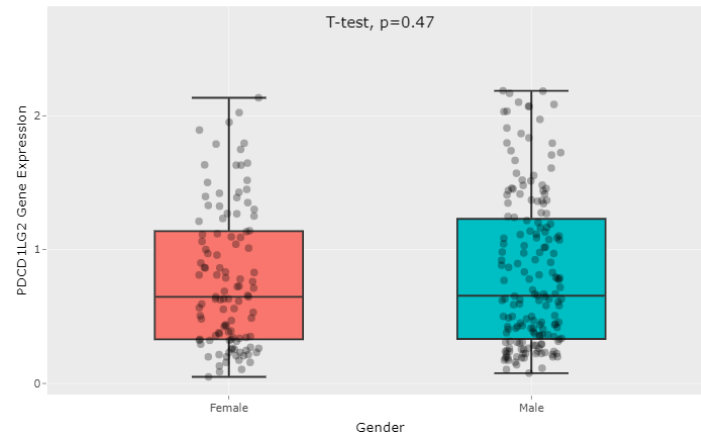

### SIGLEC15

H

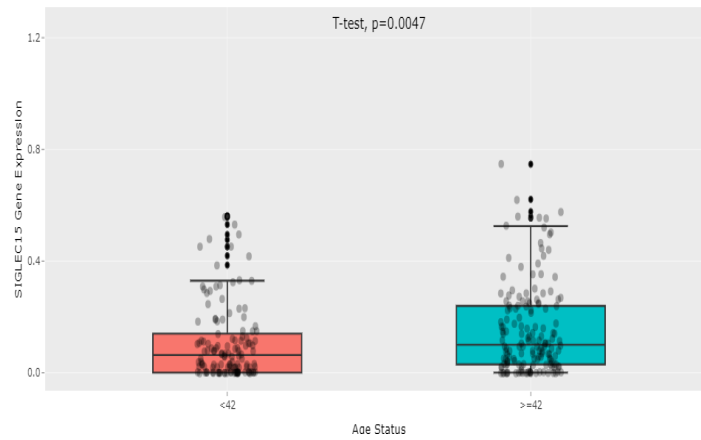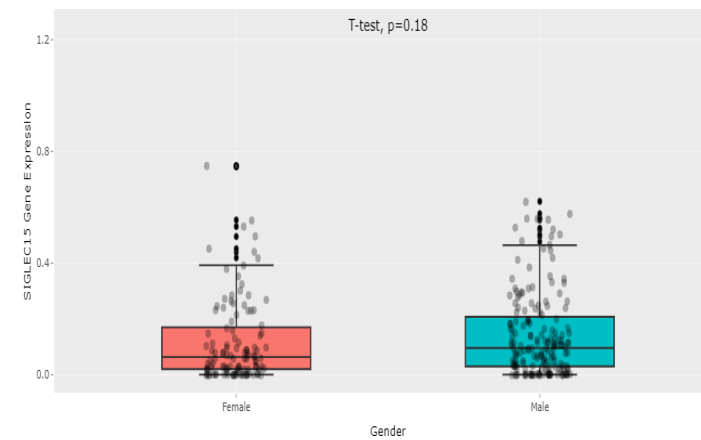

Figure S2. Kaplan-Meier overall survival curves of the immune checkpoint genes in glioma: (A) CD274, (B) CTLA4, (C) LAG3, (D) TIGIT, (E) PDCD1, (F) PDCD1LG2, and (G) SIGLEC15.

CD274

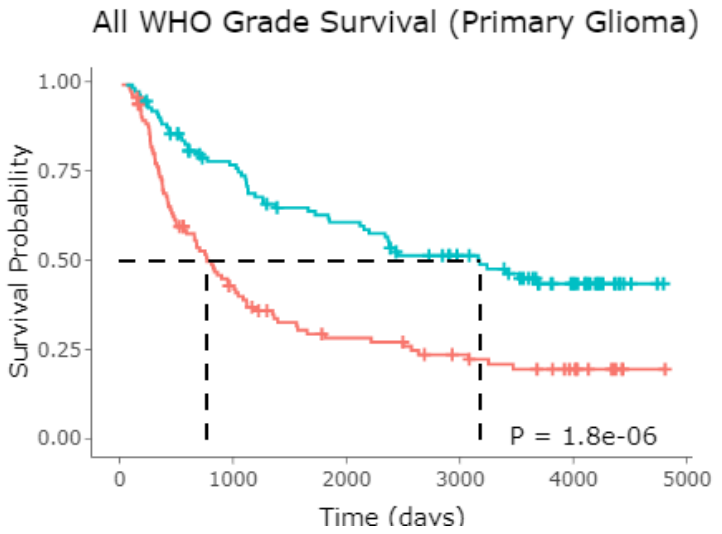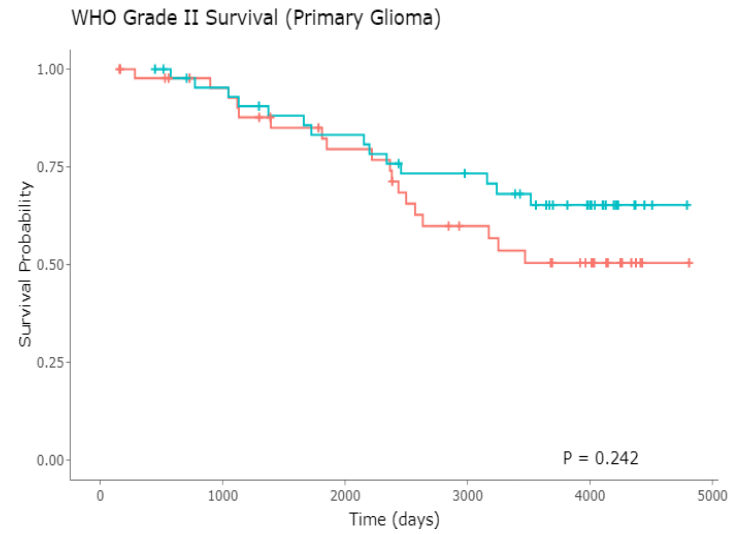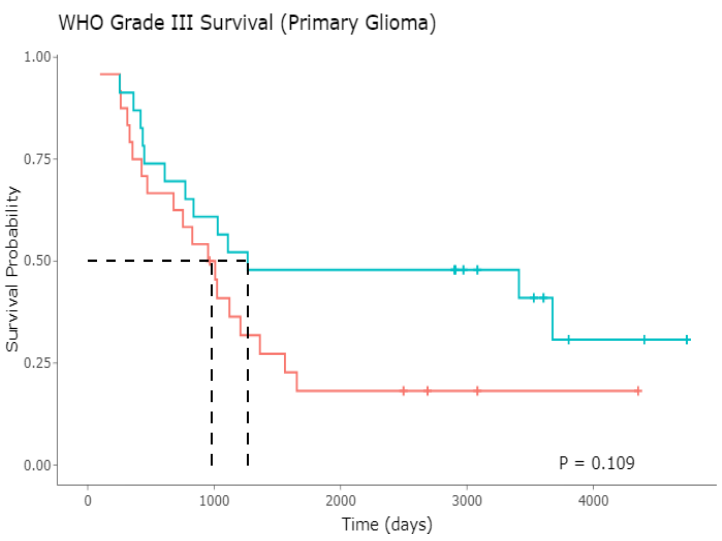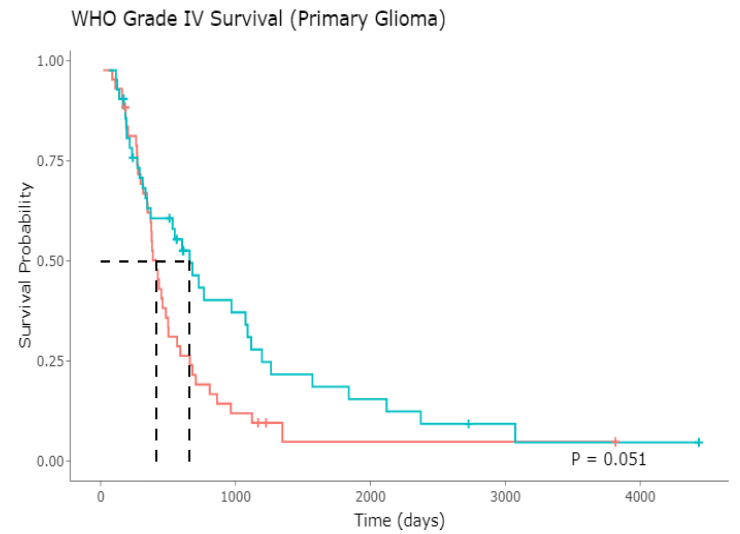



Figure2 B

CTLA4

All WHO Grade Survival (Primary Glioma)

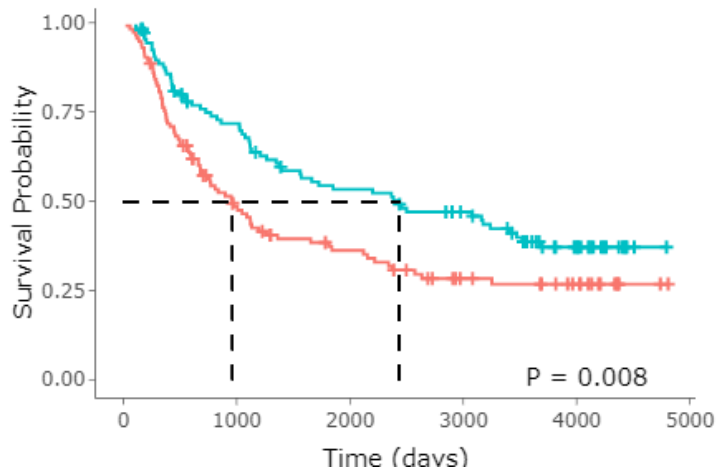

WHO Grade II Survival (Primary Glioma)

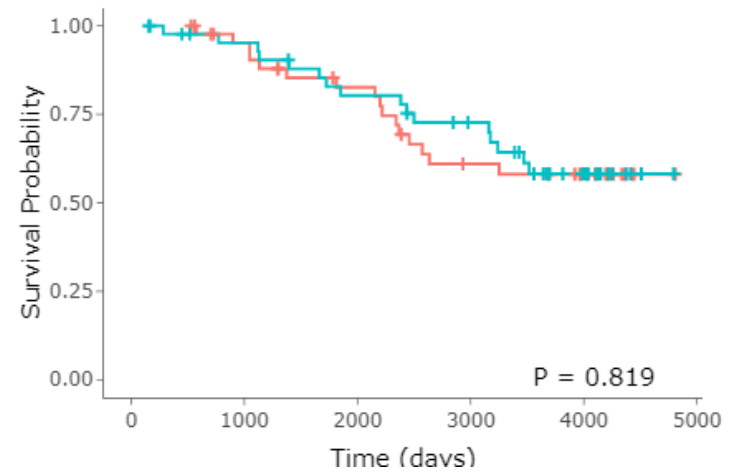

WHO Grade III Survival (Primary Glioma)

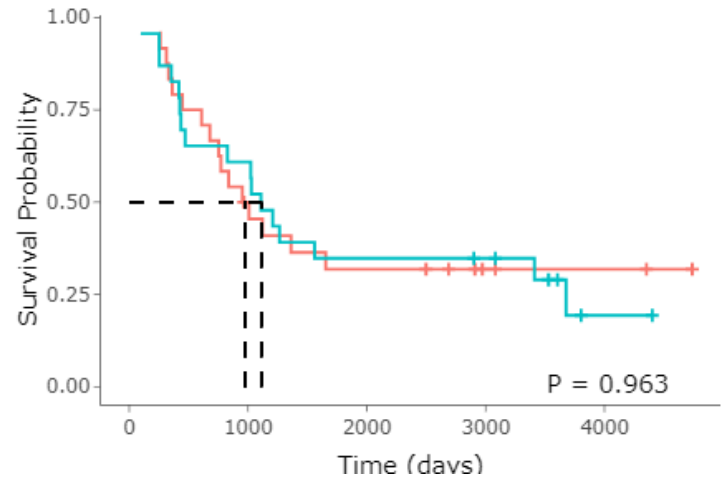

WHO Grade IV Survival (Primary Glioma)

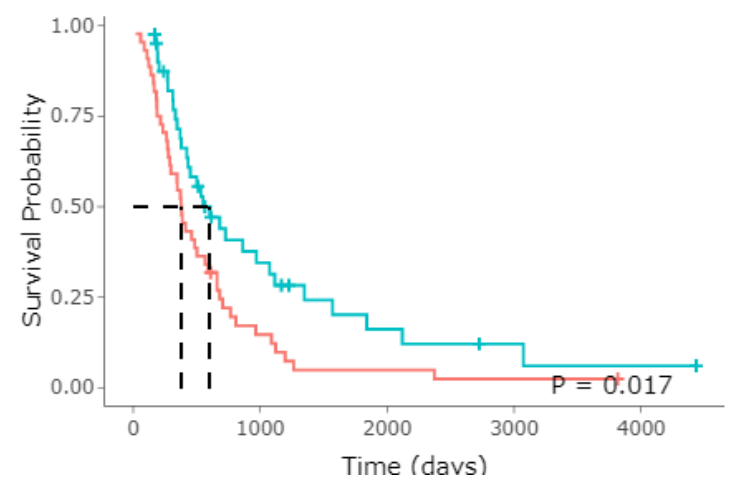

LAG3

All WHO Grade Survival (Primary Glioma)

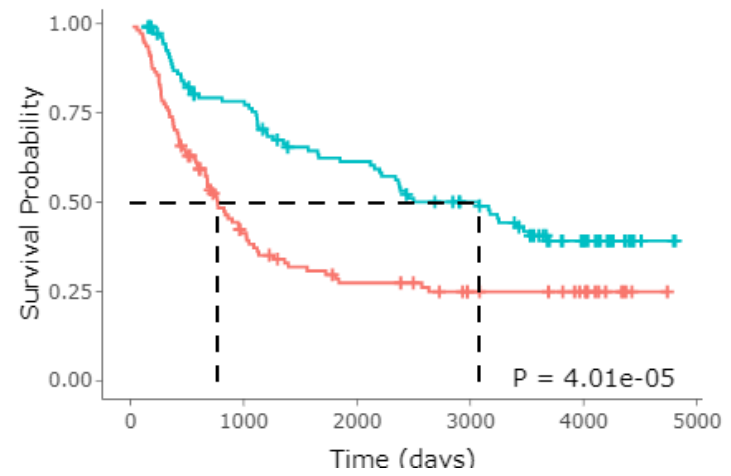

WHO Grade II Survival (Primary Glioma)

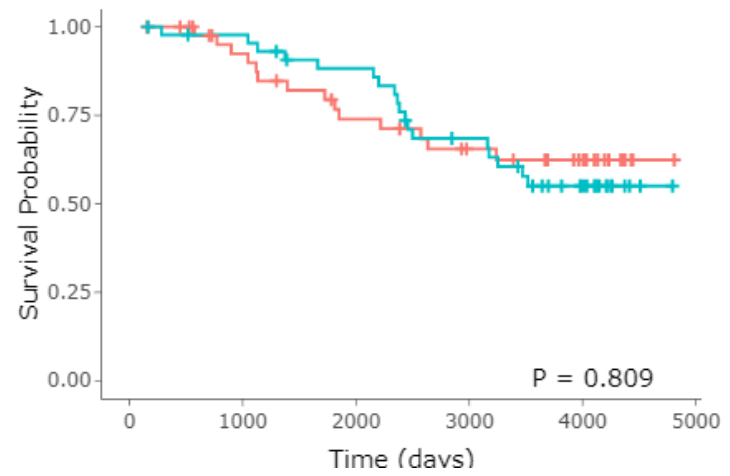

WHO Grade III Survival (Primary Glioma)

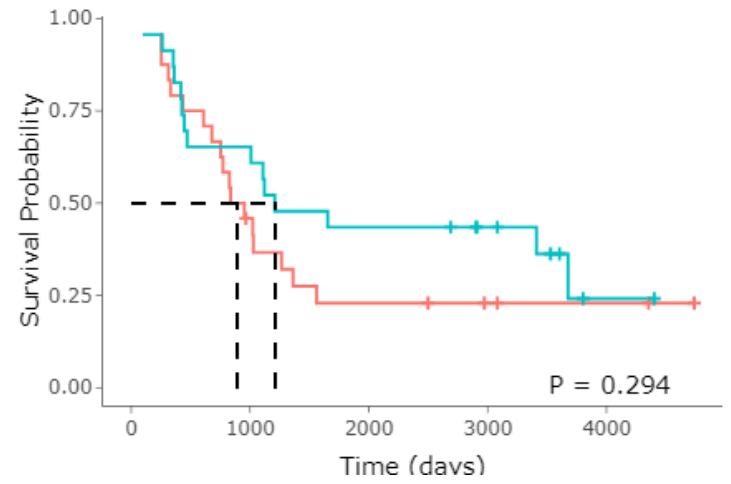

WHO Grade IV Survival (Primary Glioma)

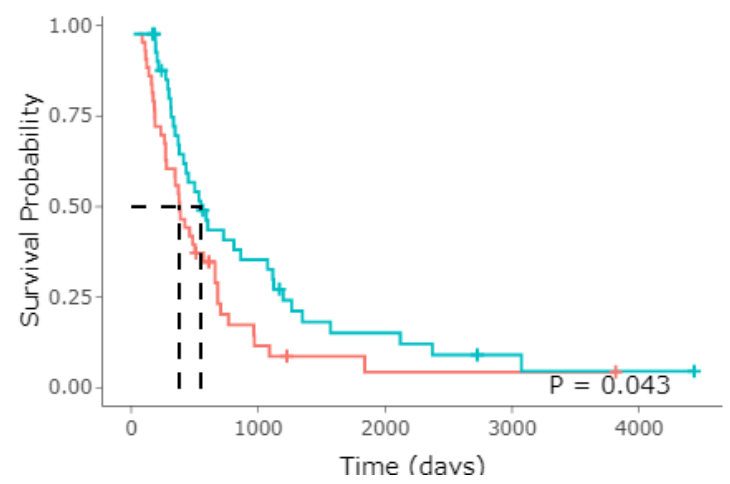

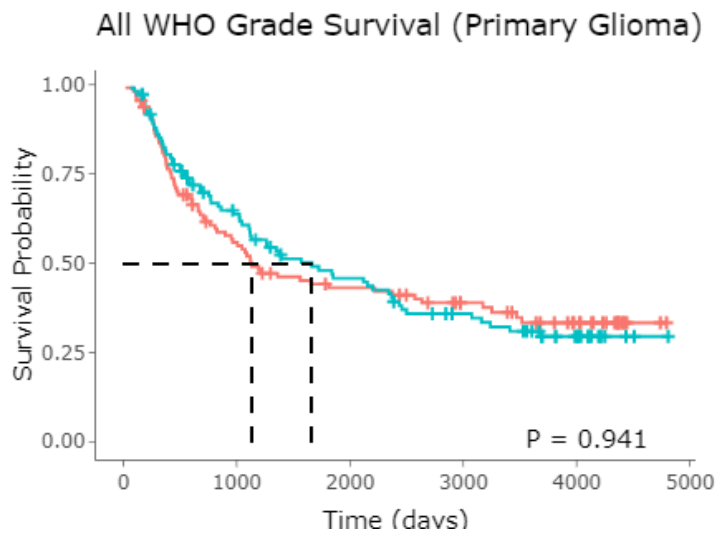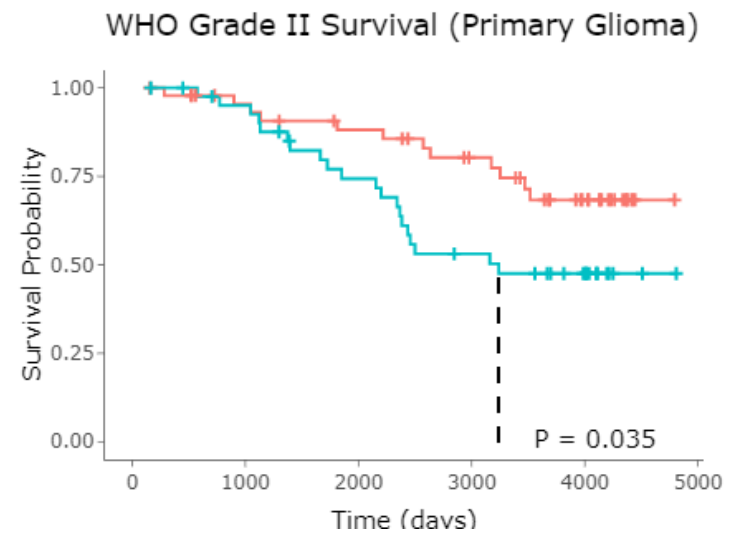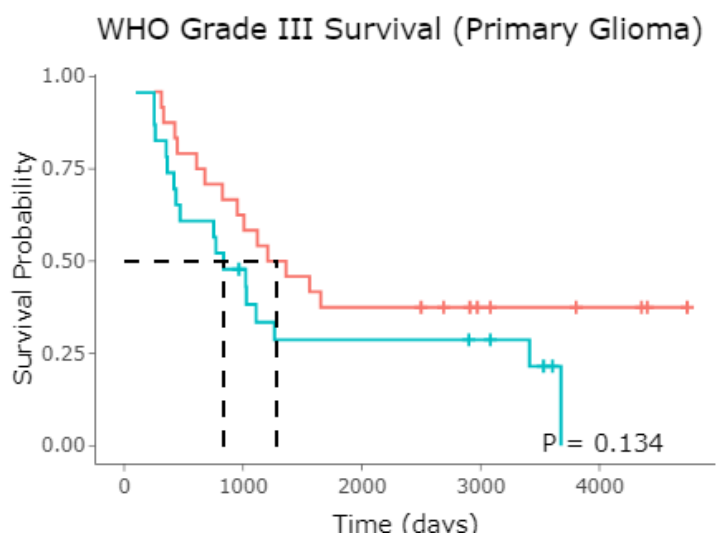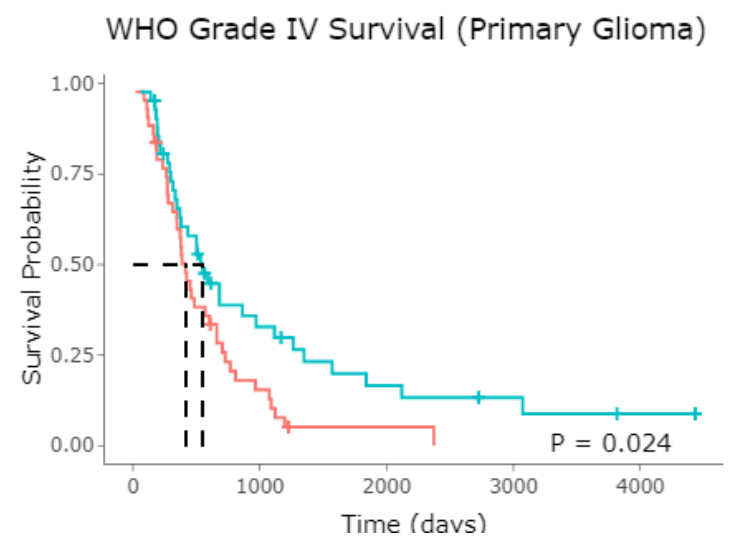

Figure 2 E

PDCD1

All WHO Grade Survival (Primary Glioma)

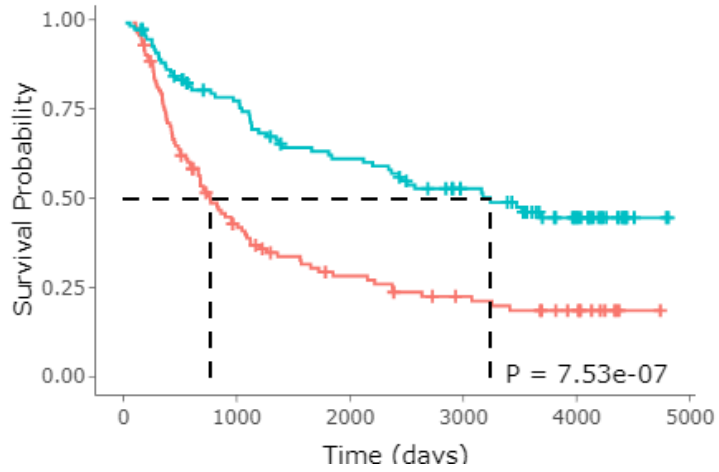

WHO Grade II Survival (Primary Glioma)

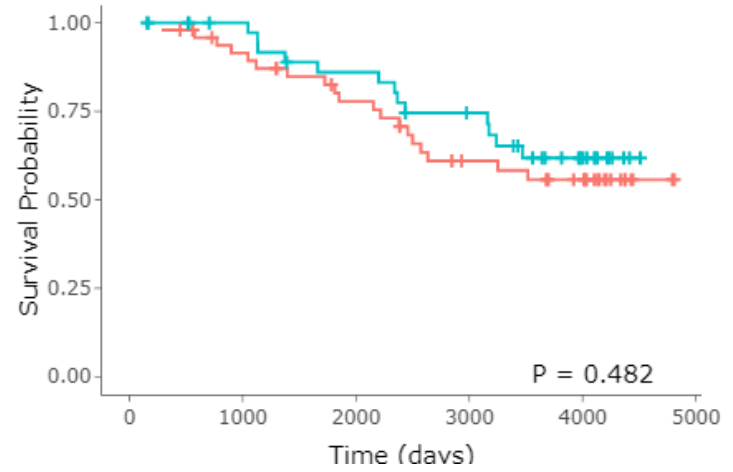

WHO Grade III Survival (Primary Glioma)

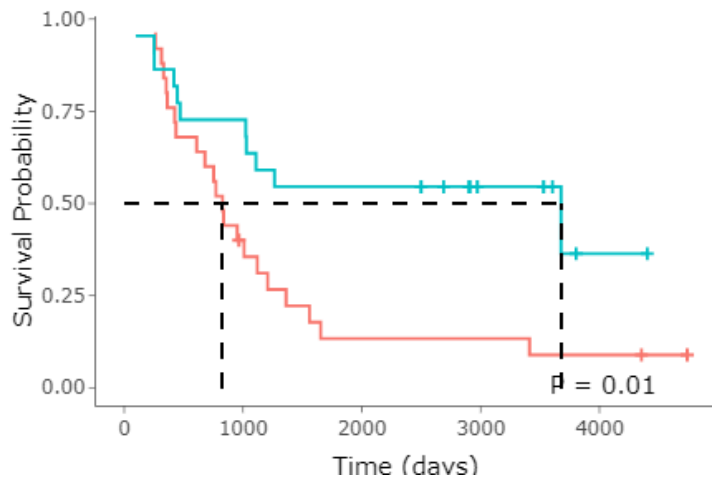

WHO Grade IV Survival (Primary Glioma)

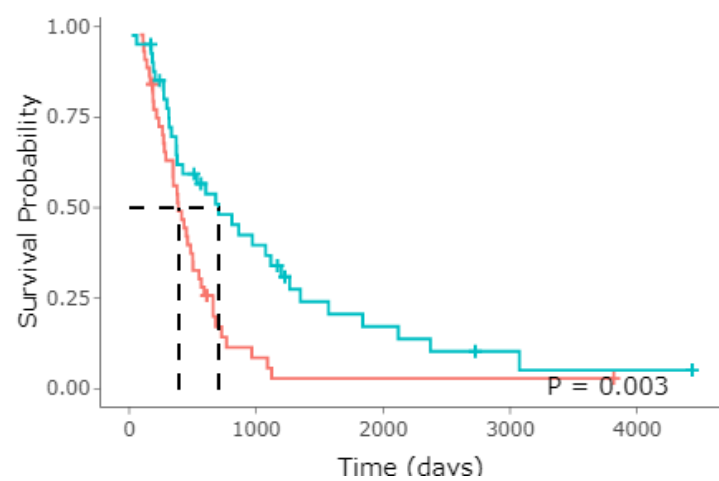

Figure2 F

PDCD1LG2

All WHO Grade Survival (Primary Glioma)

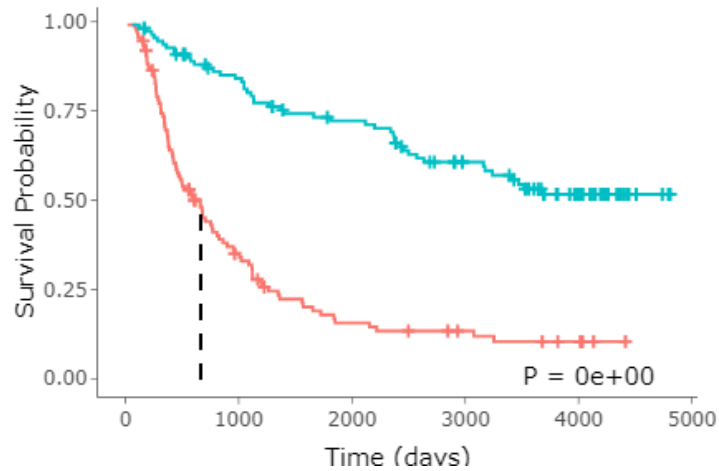

WHO Grade II Survival (Primary Glioma)

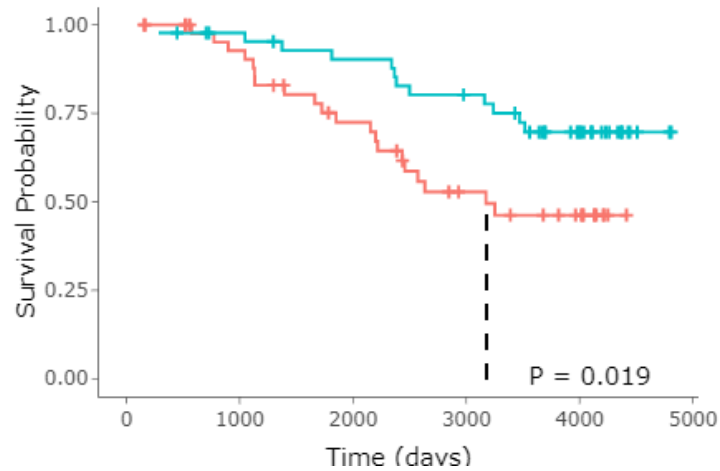

WHO Grade III Survival (Primary Glioma)

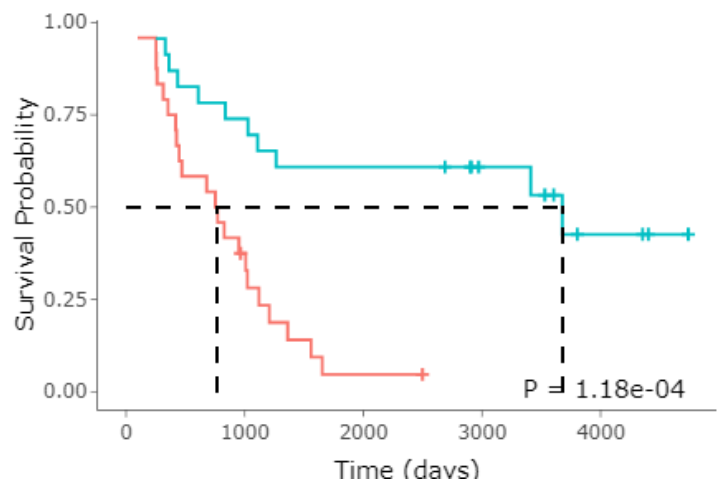

WHO Grade IV Survival (Primary Glioma)

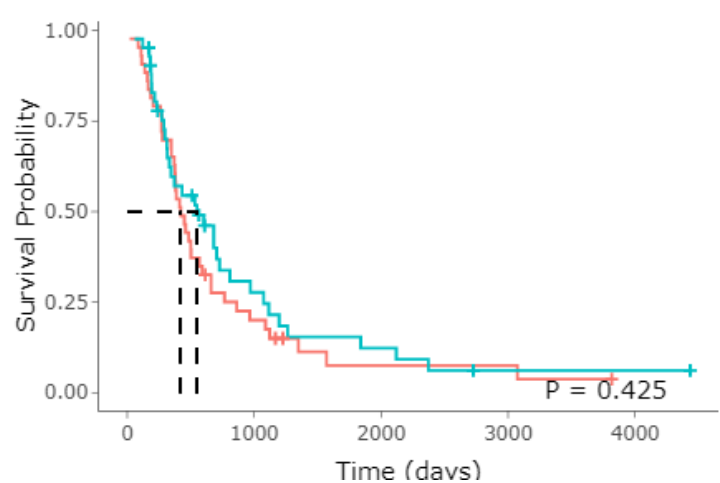

SIGLEC15

All WHO Grade Survival (Primary Glioma)

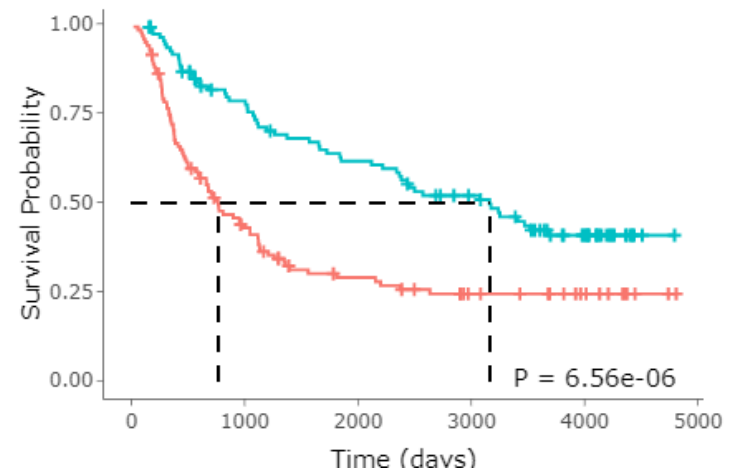

WHO Grade II Survival (Primary Glioma)

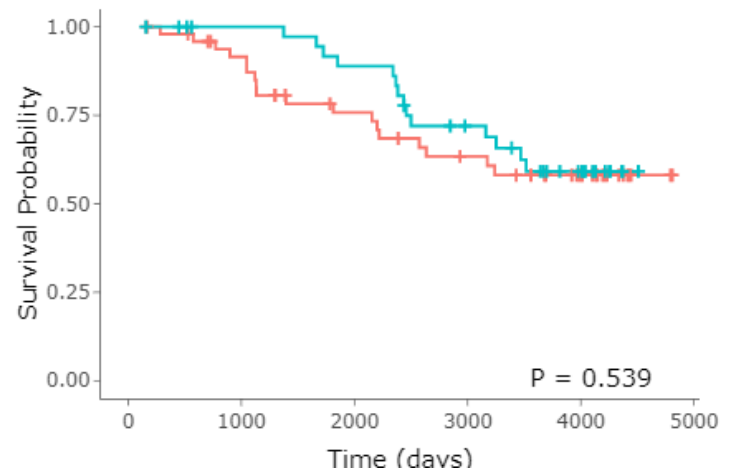

WHO Grade III Survival (Primary Glioma)

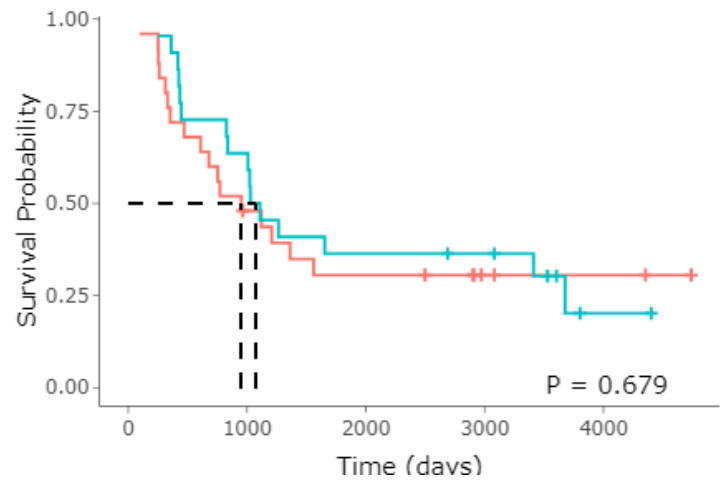

WHO Grade IV Survival (Primary Glioma)

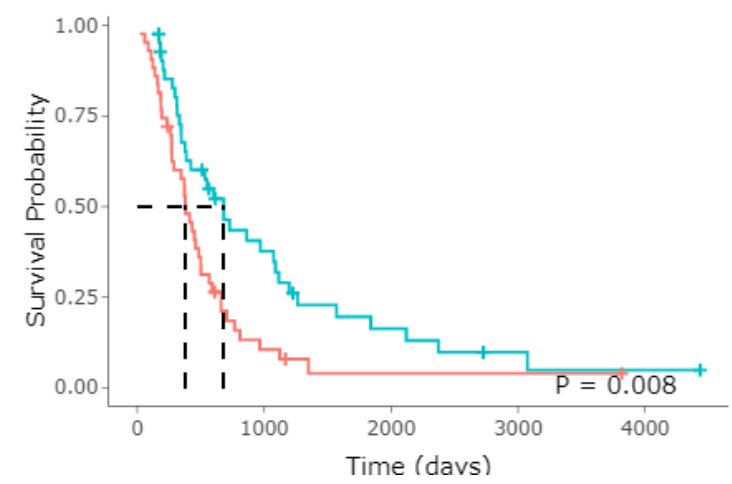

Figure S3. Correlation between the eight immune checkpoint genes: (A-B) GBM, (C-D) LGG.

Figure3 A

## GBM

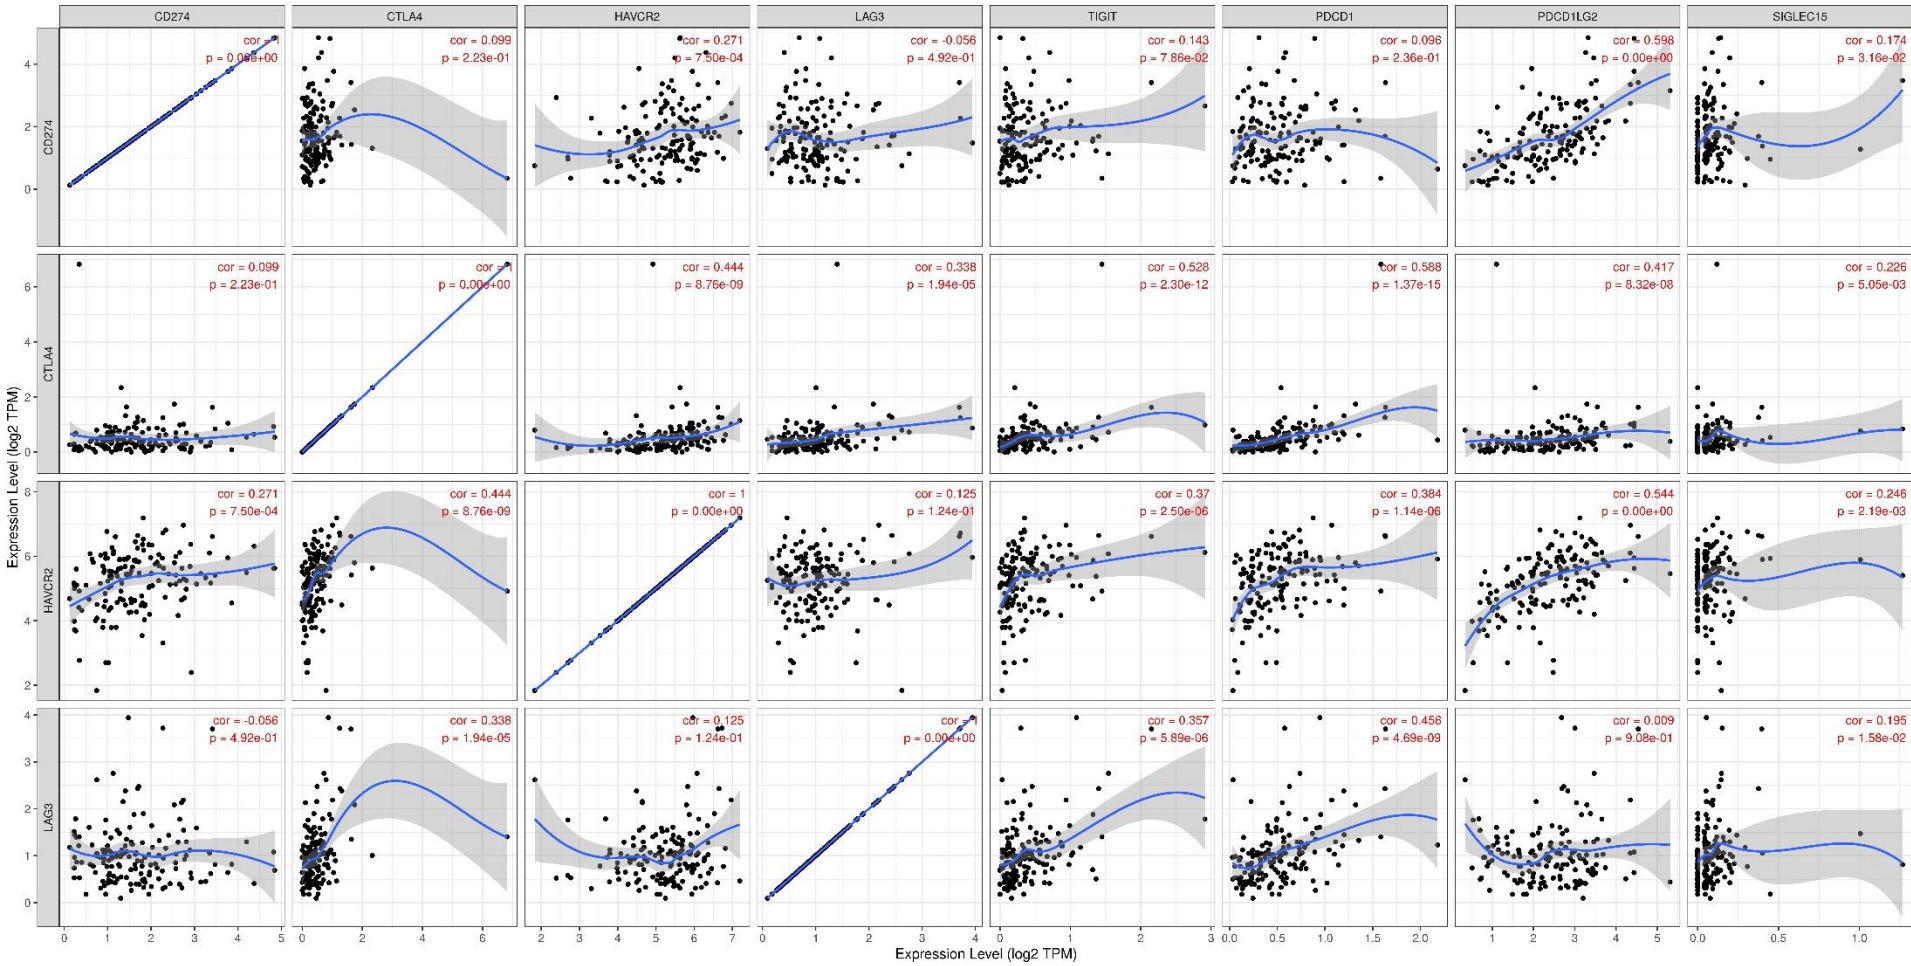



Figure3 B

## GBM

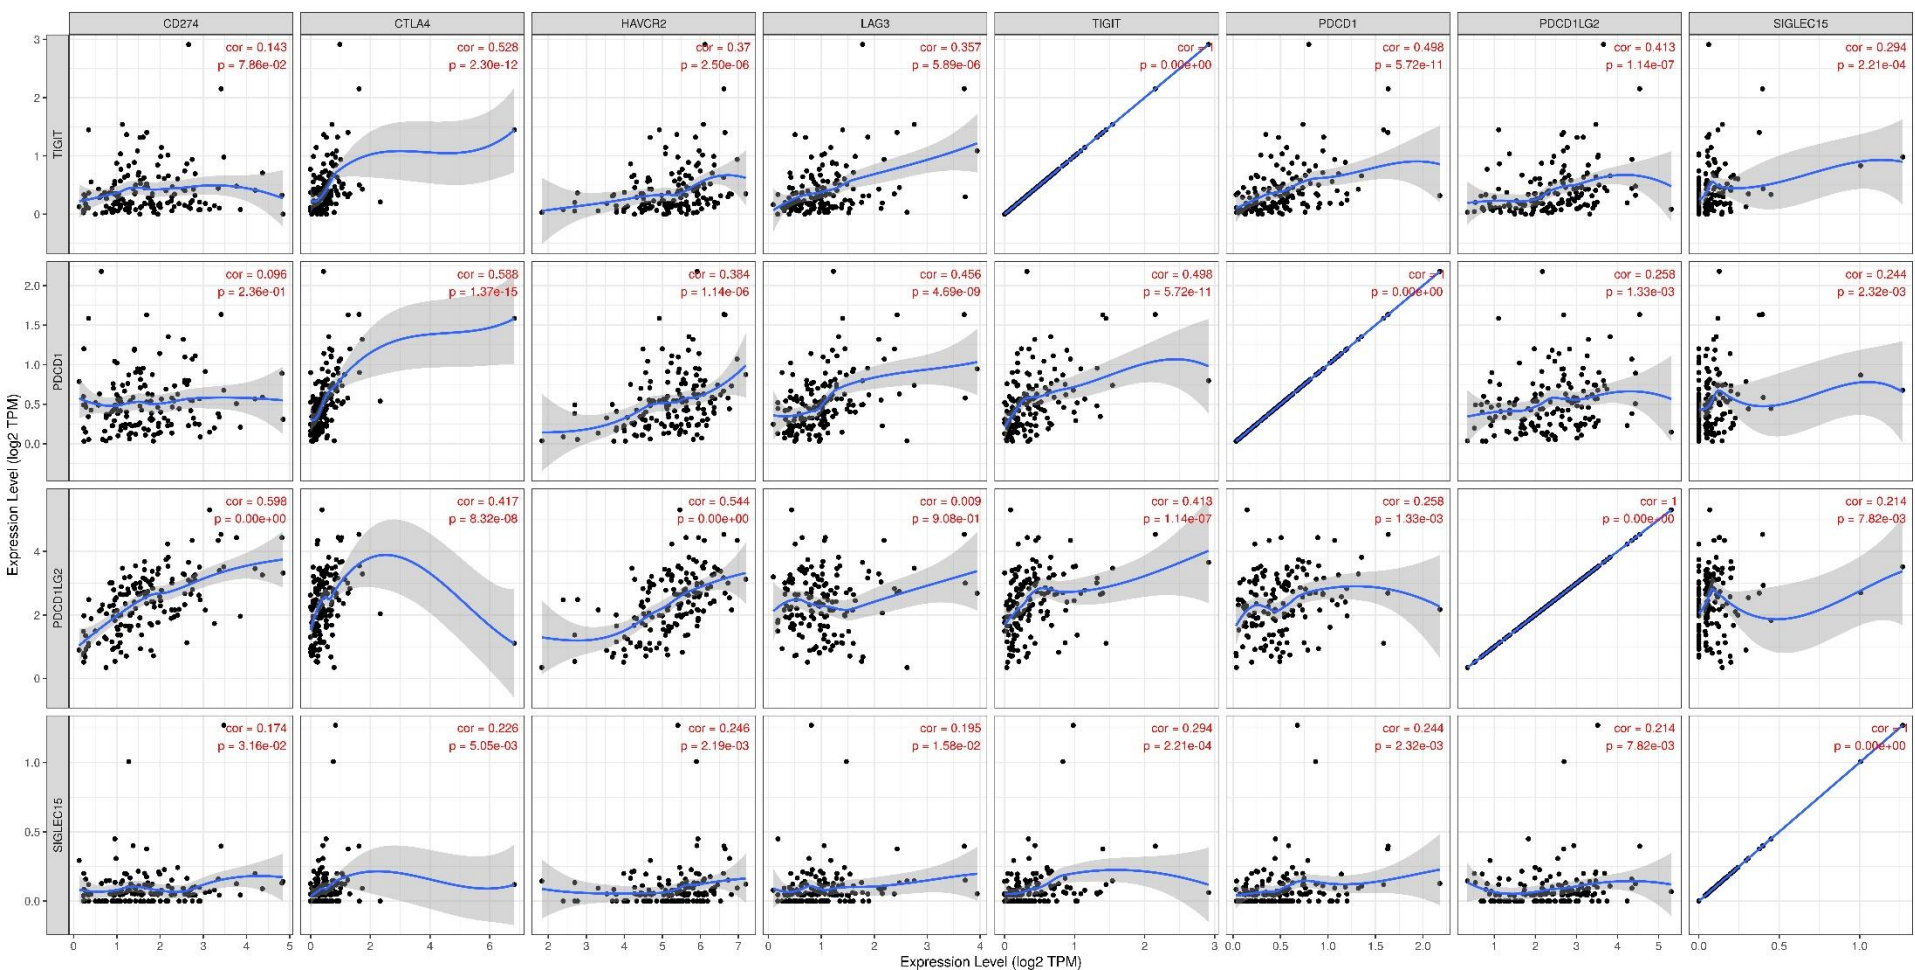

Figure3 C

## LGG

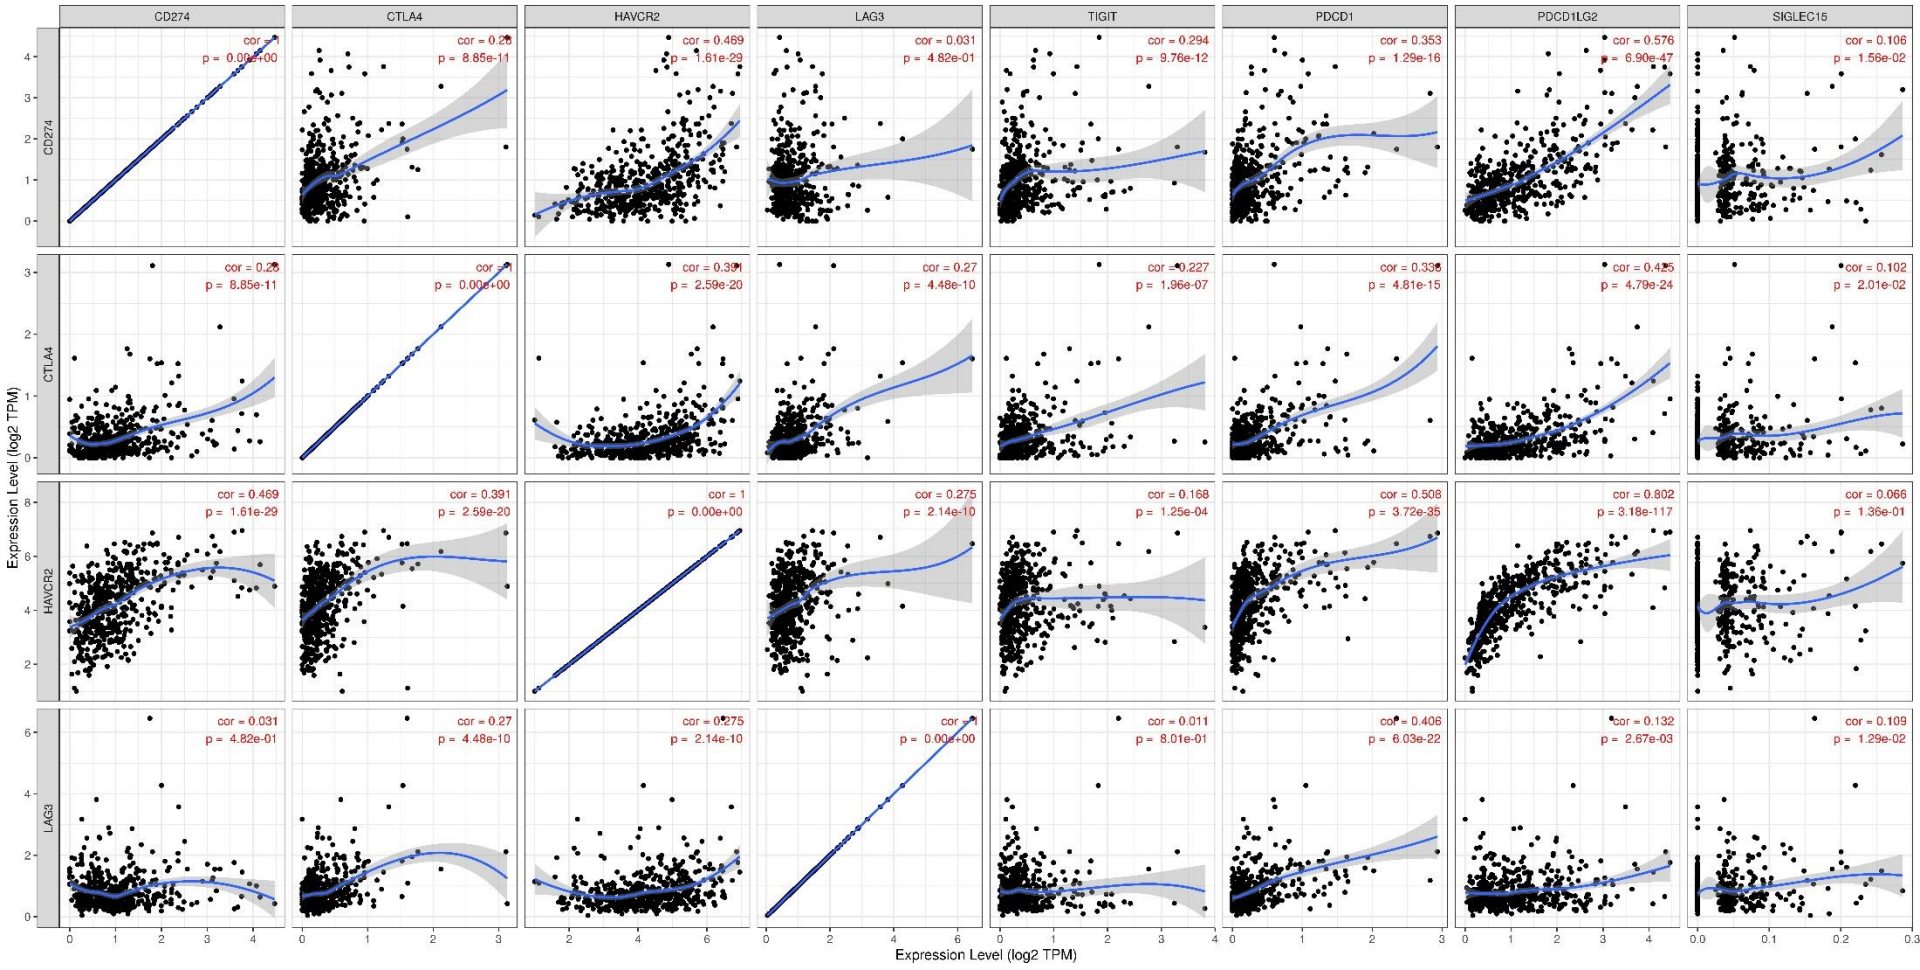

Figure3 D

# LGG

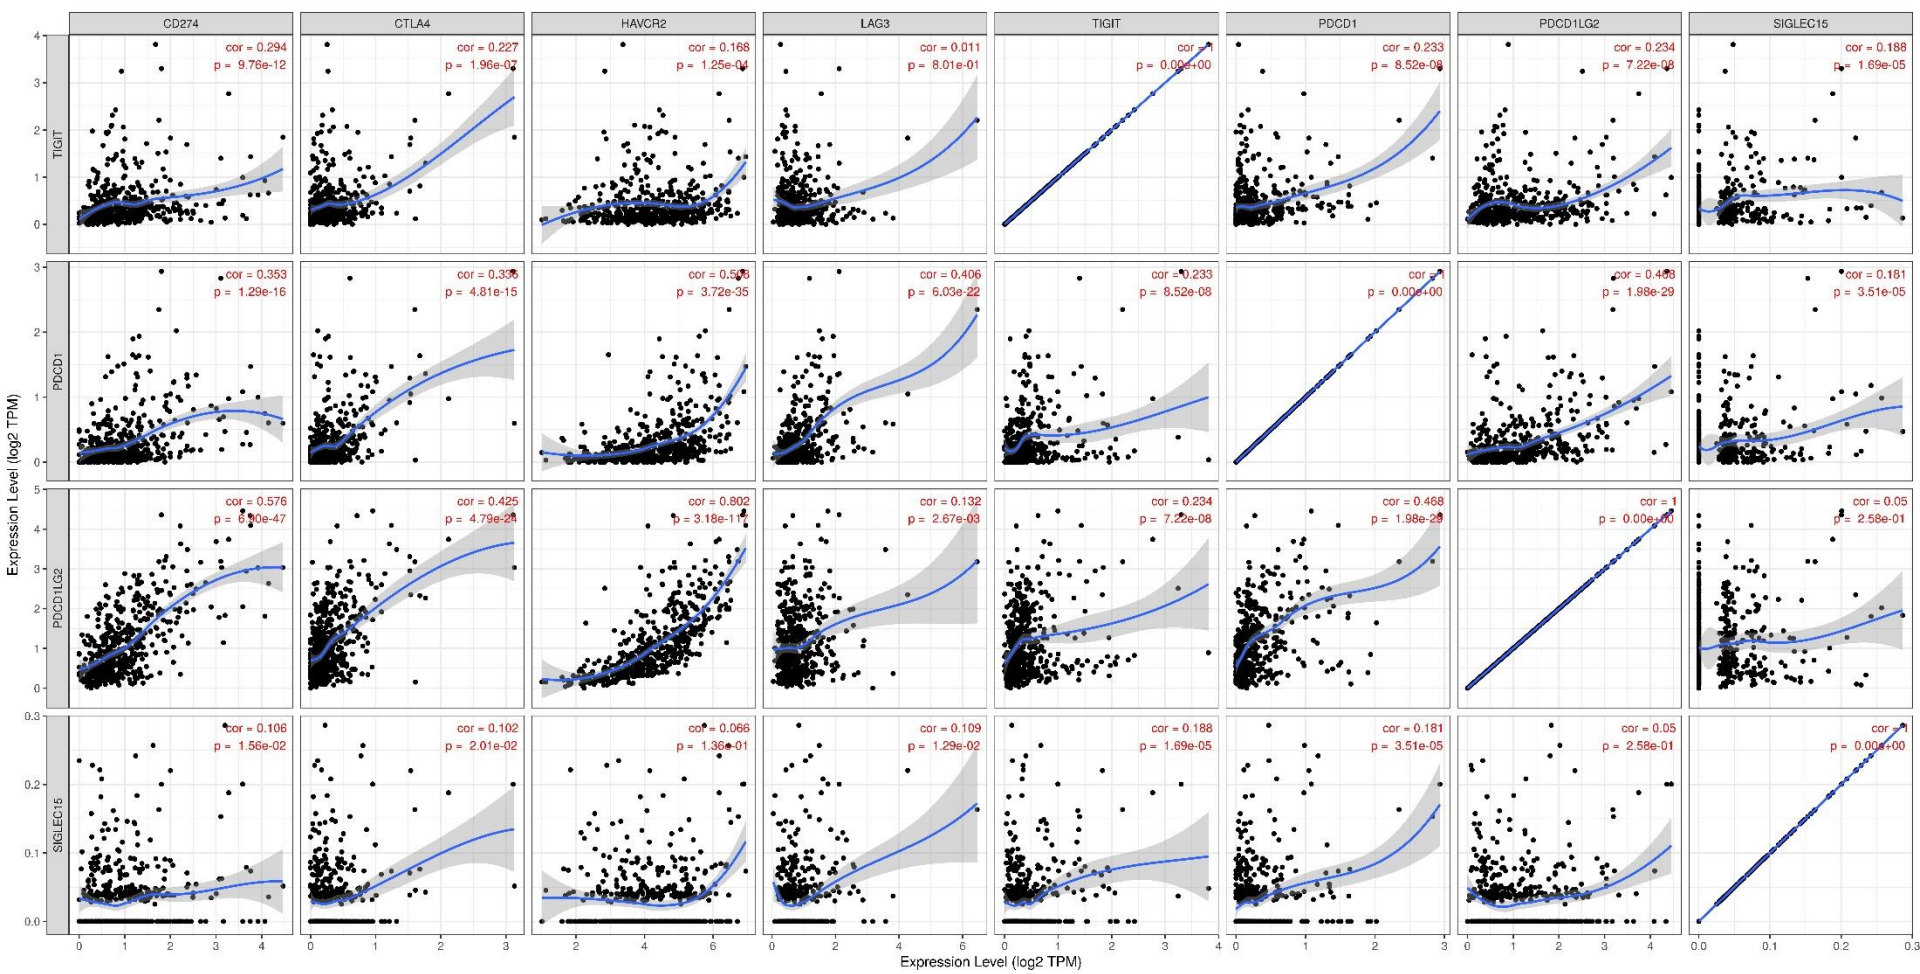

Figure S4. Heatmaps showing the correlation between HAVCR2 gene expression and tumor-immune system interactions across all cancers in TCGA. Correlation between HAVCR2 gene expression and (A) tumor-infiltrating lymphocytes (TILs), (B) immune inhibitors, (C) immune stimulators, (D) MHC molecules, (E) chemokines, and (F) receptors.



Figure S5. Correlation of immune checkpoint gene expression with immune cell infiltration in GBM using TIMER: (A) CD274, (B) CTLA4, (C) HAVCR2, (D) LAG3, (E) TIGIT, (F) PDCD1, (G) PDCD1LG2, and (H) SIGLEC15.

Figure5-1 GBM

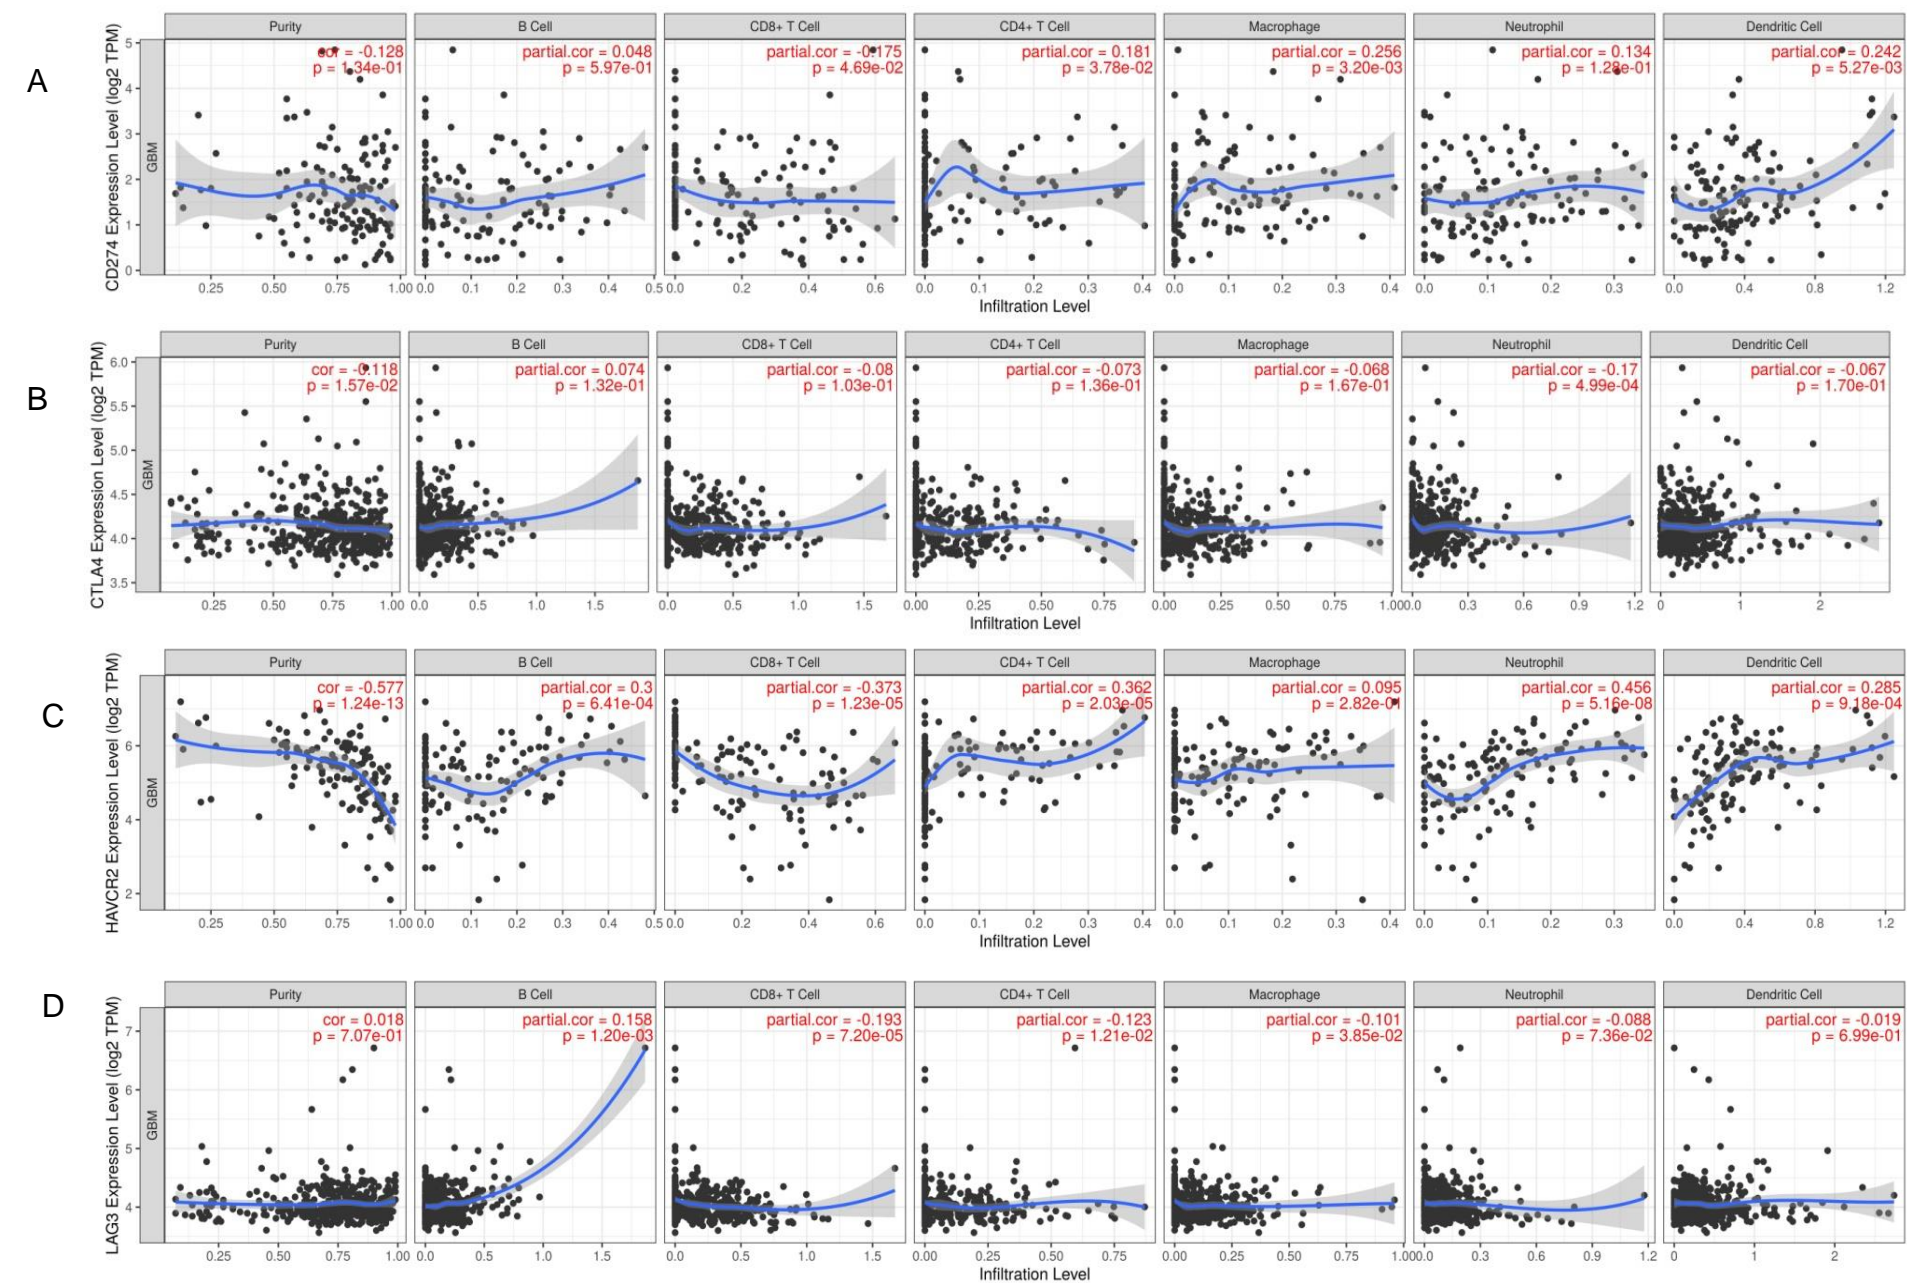

Figure5-2

## GBM

E

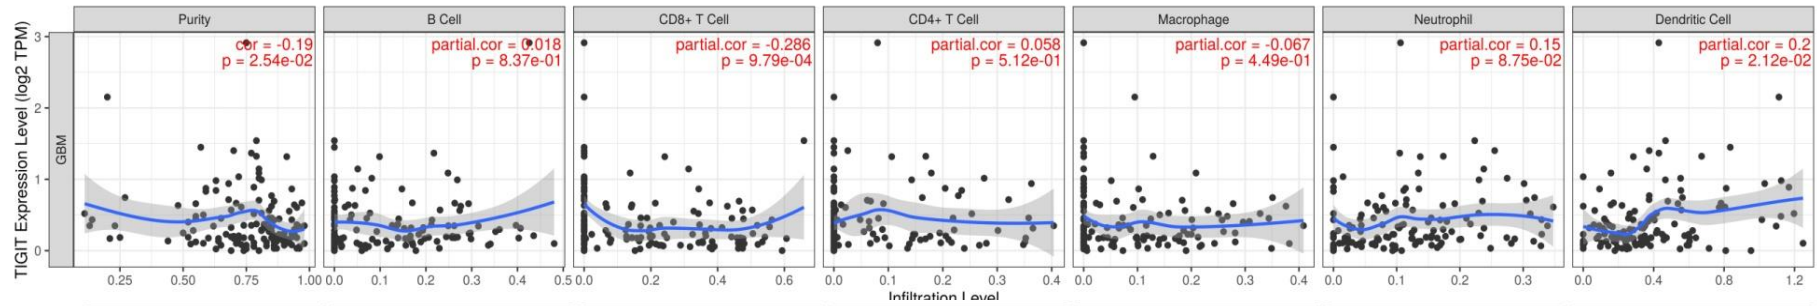

F

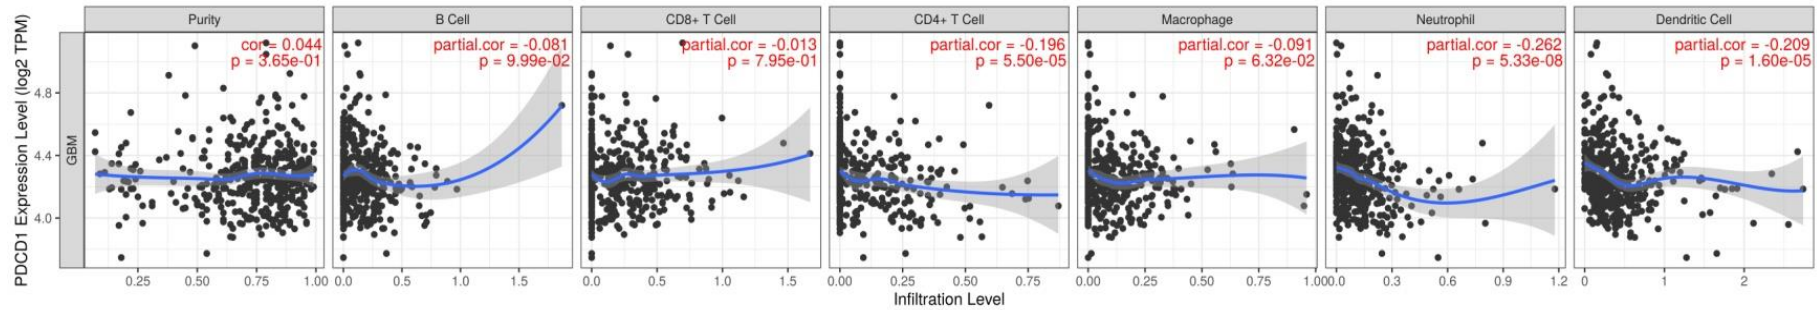

G

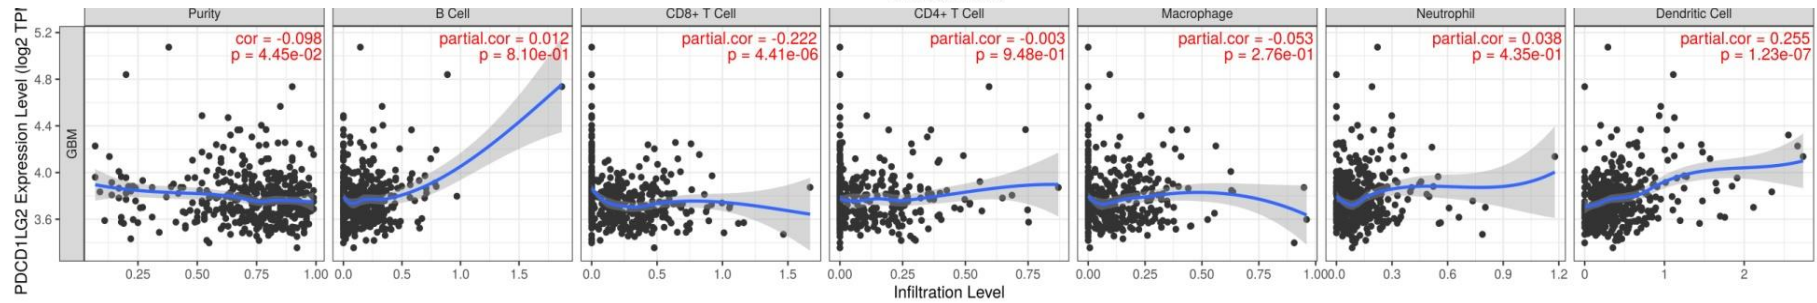

H

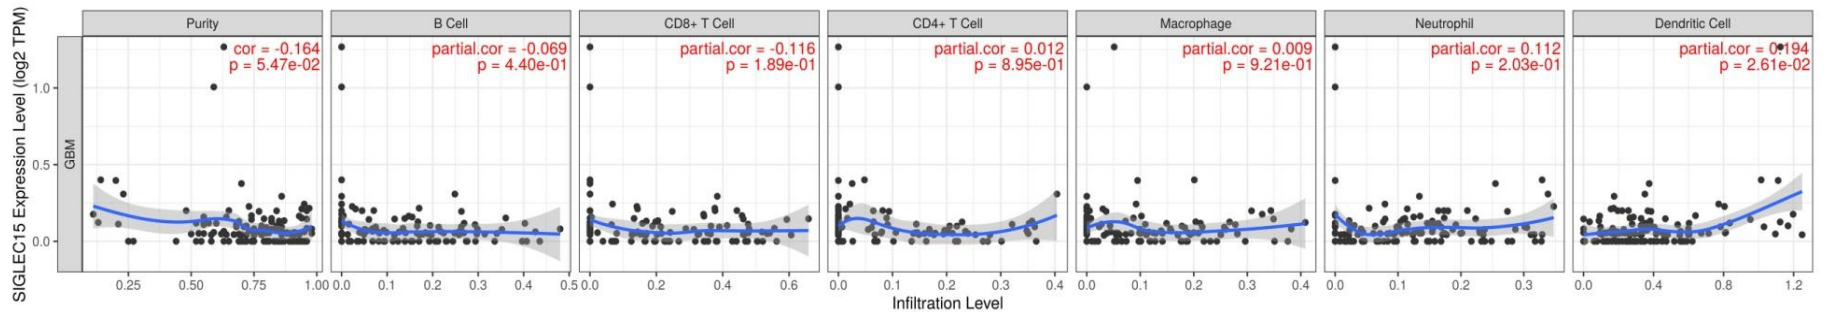



Figure S6. Correlation of immune checkpoint gene expression with immune cell infiltration in LGG using TIMER: (A) CD274, (B) CTLA4, (C) HAVCR2, (D) LAG3, (E) TIGIT, (F) PDCD1, (G) PDCD1LG2, and (H) SIGLEC15.

Figure6-1

## LGG

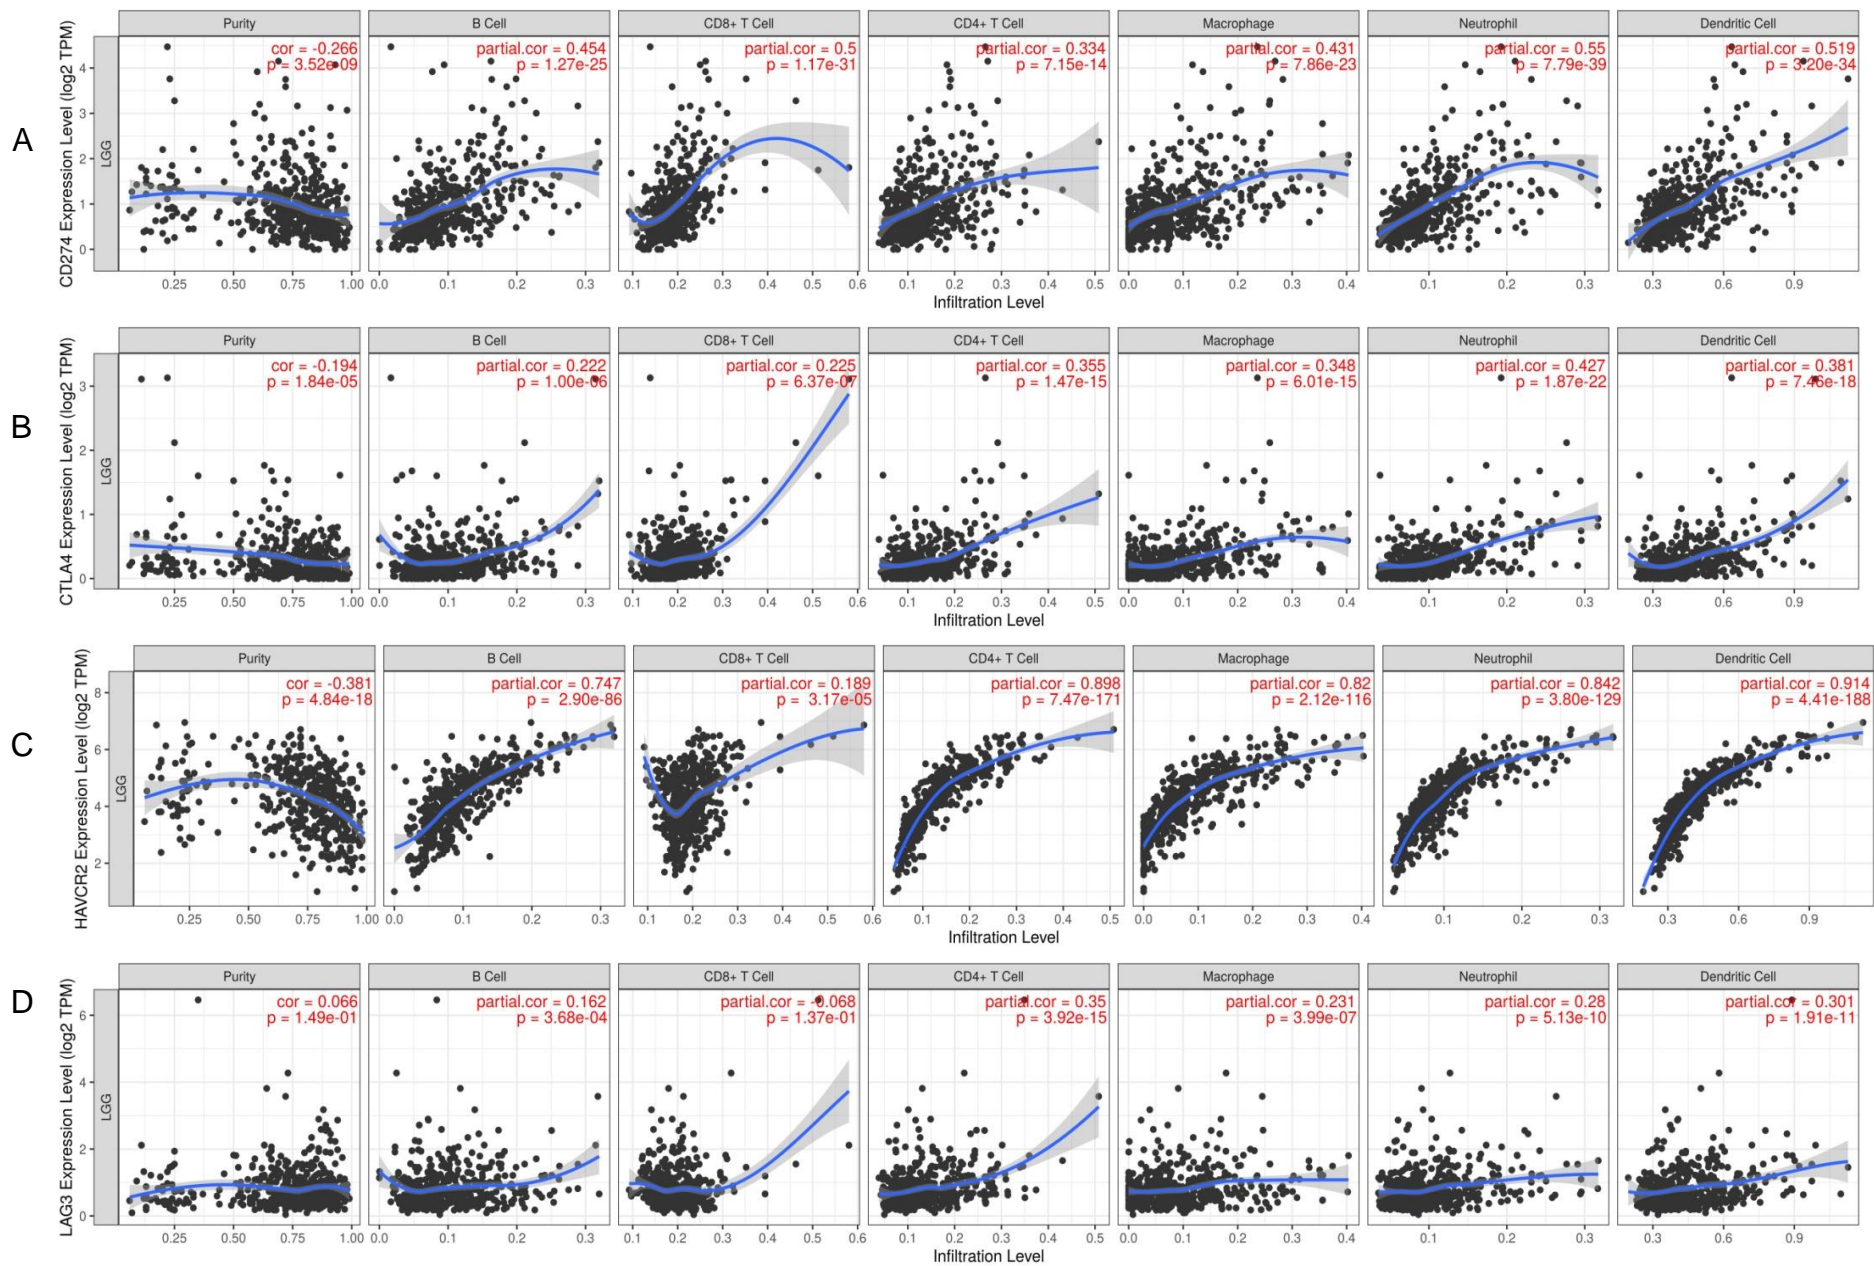

Figure6-2

## LGG

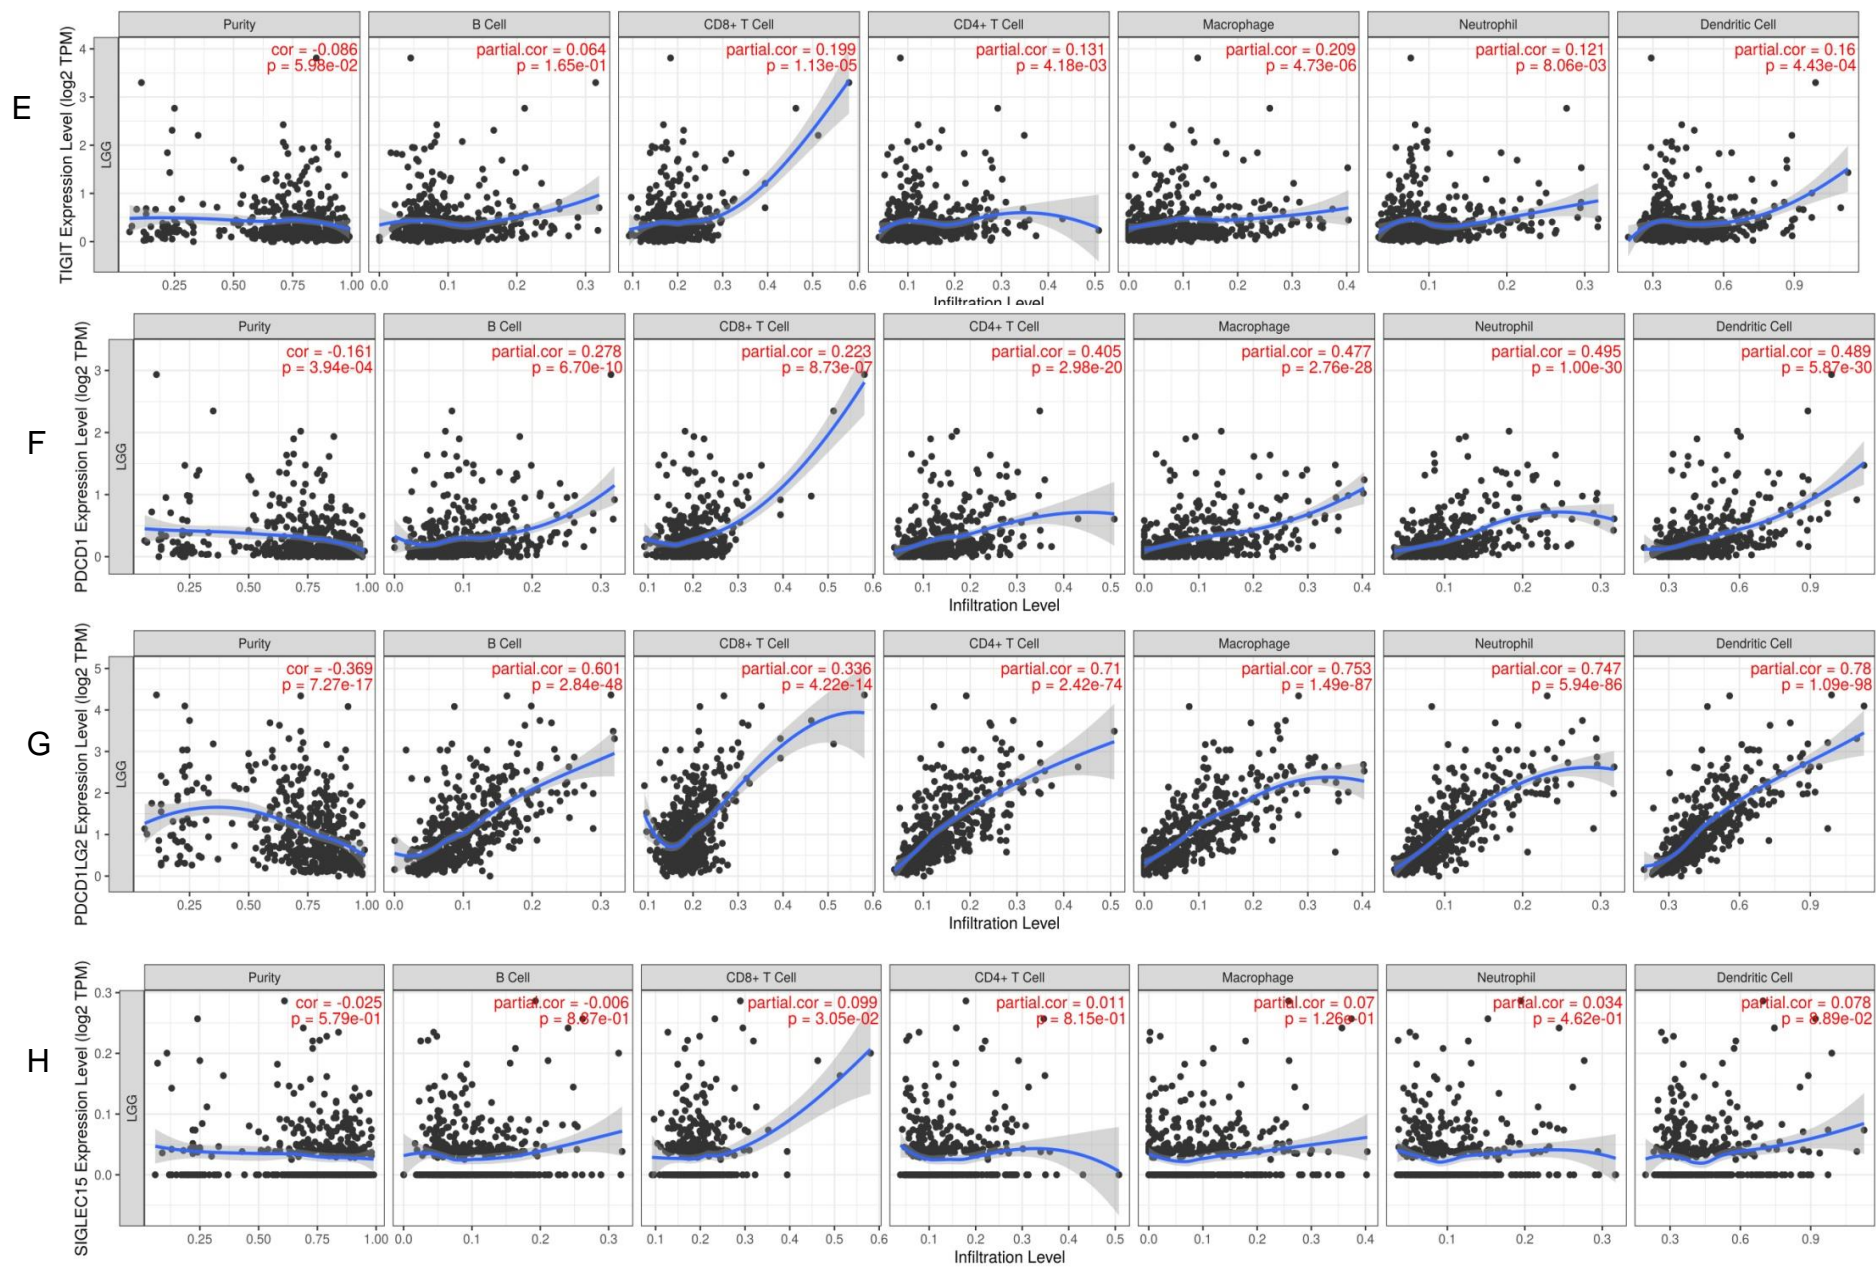

Supplement: 1734847.f1.pdf [file 1734847.f1.pdf]
